# Supplementary material for: Sequential extraction of high-value added molecules from grape pomaces using supercritical fluids with water as a co-solvent
Source: Royal Society of Chemistry journal article supplement (doi:10.1039/d3su00183k), 2023-01-01
Supplement: d3su00183k1.pdf [file d3su00183k1.pdf]

## Supplementary information

### Sequential extraction of high-added value molecules from grape pomace via supercritical fluid extraction applying water as co-solvent

Gayane Hayrapetyan<sup>(1,2)</sup>, Karen Trchounian<sup>(2)</sup>, Laurine Buon<sup>(3)</sup>, Laurence Noret <sup>(1)</sup>, Benoît Pinel<sup>(4)</sup>, Jeremy Lagrue<sup>(4)</sup>, Ali Assifaoui <sup>(1)</sup> \*

<sup>(1)</sup> UMR PAM, Equipe PCAV, Université de Bourgogne/Institut Agro, 1 Esp. Erasme, Agrosup, 21000 Dijon, France

<sup>(2)</sup> Department of Biochemistry, Microbiology and Biotechnology, Yerevan State University, 1 Alex Manoogian St, Yerevan 0025, Armenia

<sup>(3)</sup> CERMAV (Centre de Recherches sur les Macromolécules Végétales), 38041 Grenoble, France

<sup>(4)</sup> SFE process 107 Bd Tolstoï, 54510 Tomblaine, France

\*Corresponding author

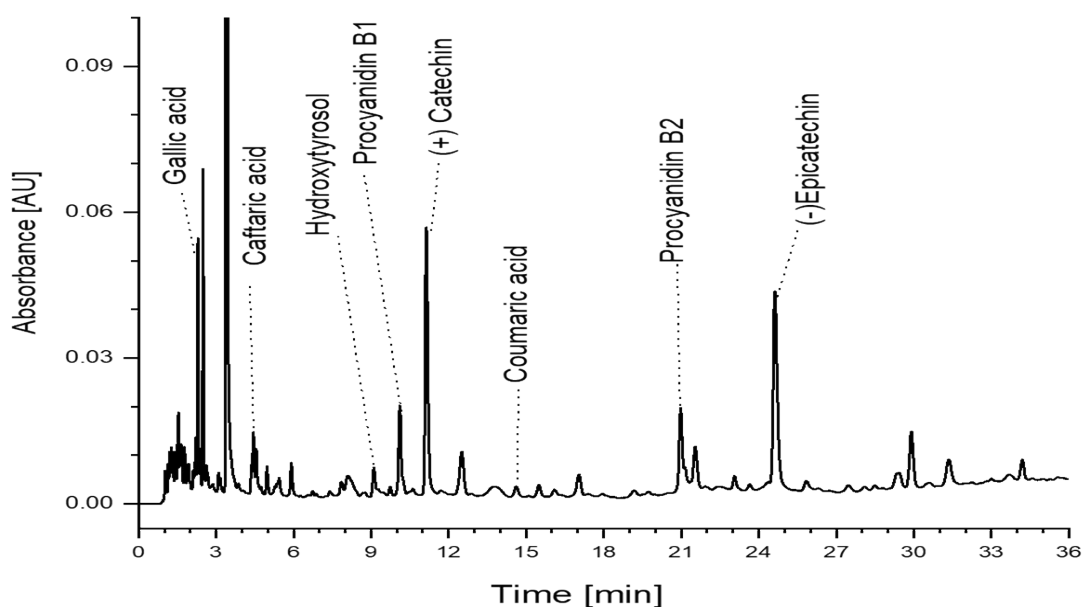

**Fig. S.1** UHPLC chromatogram of SC-CO<sub>2</sub> + H<sub>2</sub>O extracts under UV 280nm

**TABLE S.1:** UHPLC analysis of phenolic compounds of the SC-CO<sub>2</sub> + H<sub>2</sub>O extracts mg (GAE) /100g grape pomace powder

---

| <b>T °C</b> | <b>GA</b> | <b>PCA</b> | <b>CTA</b> | <b>PRC B1</b> | <b>CT</b>  | <b>CouA</b> | <b>PRC B2</b> | <b>ECT</b> |
|-------------|-----------|------------|------------|---------------|------------|-------------|---------------|------------|
| <b>40</b>   | 2.0 ± 0.0 | 2.4 ± 0.3  | 1.1 ± 0.0  | 7.0 ± 0.2     | 20.2 ± 0.1 | 0.5 ± 0.0   | 7.9 ± 0.2     | 23.2 ± 0.5 |
| <b>60</b>   | 5.2 ± 0.1 | 6.3 ± 0.5  | 3.17 ± 0.0 | 19.2 ± 0.1    | 56.6 ± 1.3 | 1.9 ± 0.1   | 20.0 ± 1.4    | 64.8 ± 1.1 |
| <b>80</b>   | 4.6 ± 0.0 | 6.6 ± 0.4  | 3.9 ± 0.2  | 22.6 ± 0.1    | 64.4 ± 0.2 | 2.1 ± 0.0   | 22.8 ± 0.3    | 70.8 ± 1.7 |

---

*Gallic acid (GA), Protocatechuic acid (PCA), Caftaric Acid (CTA), Procyanidin B1 (PRC B1), Procyanidin B2 (+) (PRC B2), Catechin (CT), p-Coumaric acid (CouA), (-) Epicatechin (ECT)*
